# Supplementary material
Source: publisher figshare collection journal article supplement (https://future-science-group.figshare.com/ndownloader/files/29051268)
Supplement: Supplementary file 1 [file 29051268]

**Supplementary Figure 1. Data for MCM10 expression in HCC from online databases.** (**A**) The transcription level of MCM10 in 20 different types of human cancers (ONCOMINE). Color is determined by the highest gene rank percentile genes based on log fold-change; red represents upregulation and blue indicates downregulation. Cut-off of P-value and fold change were as following: P-value: 0.05, fold change: 1.5, gene rank: 10%, data type: mRNA. (**B**) Relative expression of MCM10 in HCC tissues (n = 371) and adjacent normal liver tissues (n = 50) from TCGA database (UALCAN). (**C**) Relative expression of MCM10 in normal individuals (n = 50) and in HCC patients with different cancer stages (Stage 1, n = 168; Stage 2, n = 84; Stage 3, n = 82; Stage 4, n = 6). *P < 0.05, **P < 0.01, ***P < 0.001. (**D**) Representative immunohistochemistry images of MCM10 protein in HCC tissues and normal liver tissues (Human Protein Atlas).


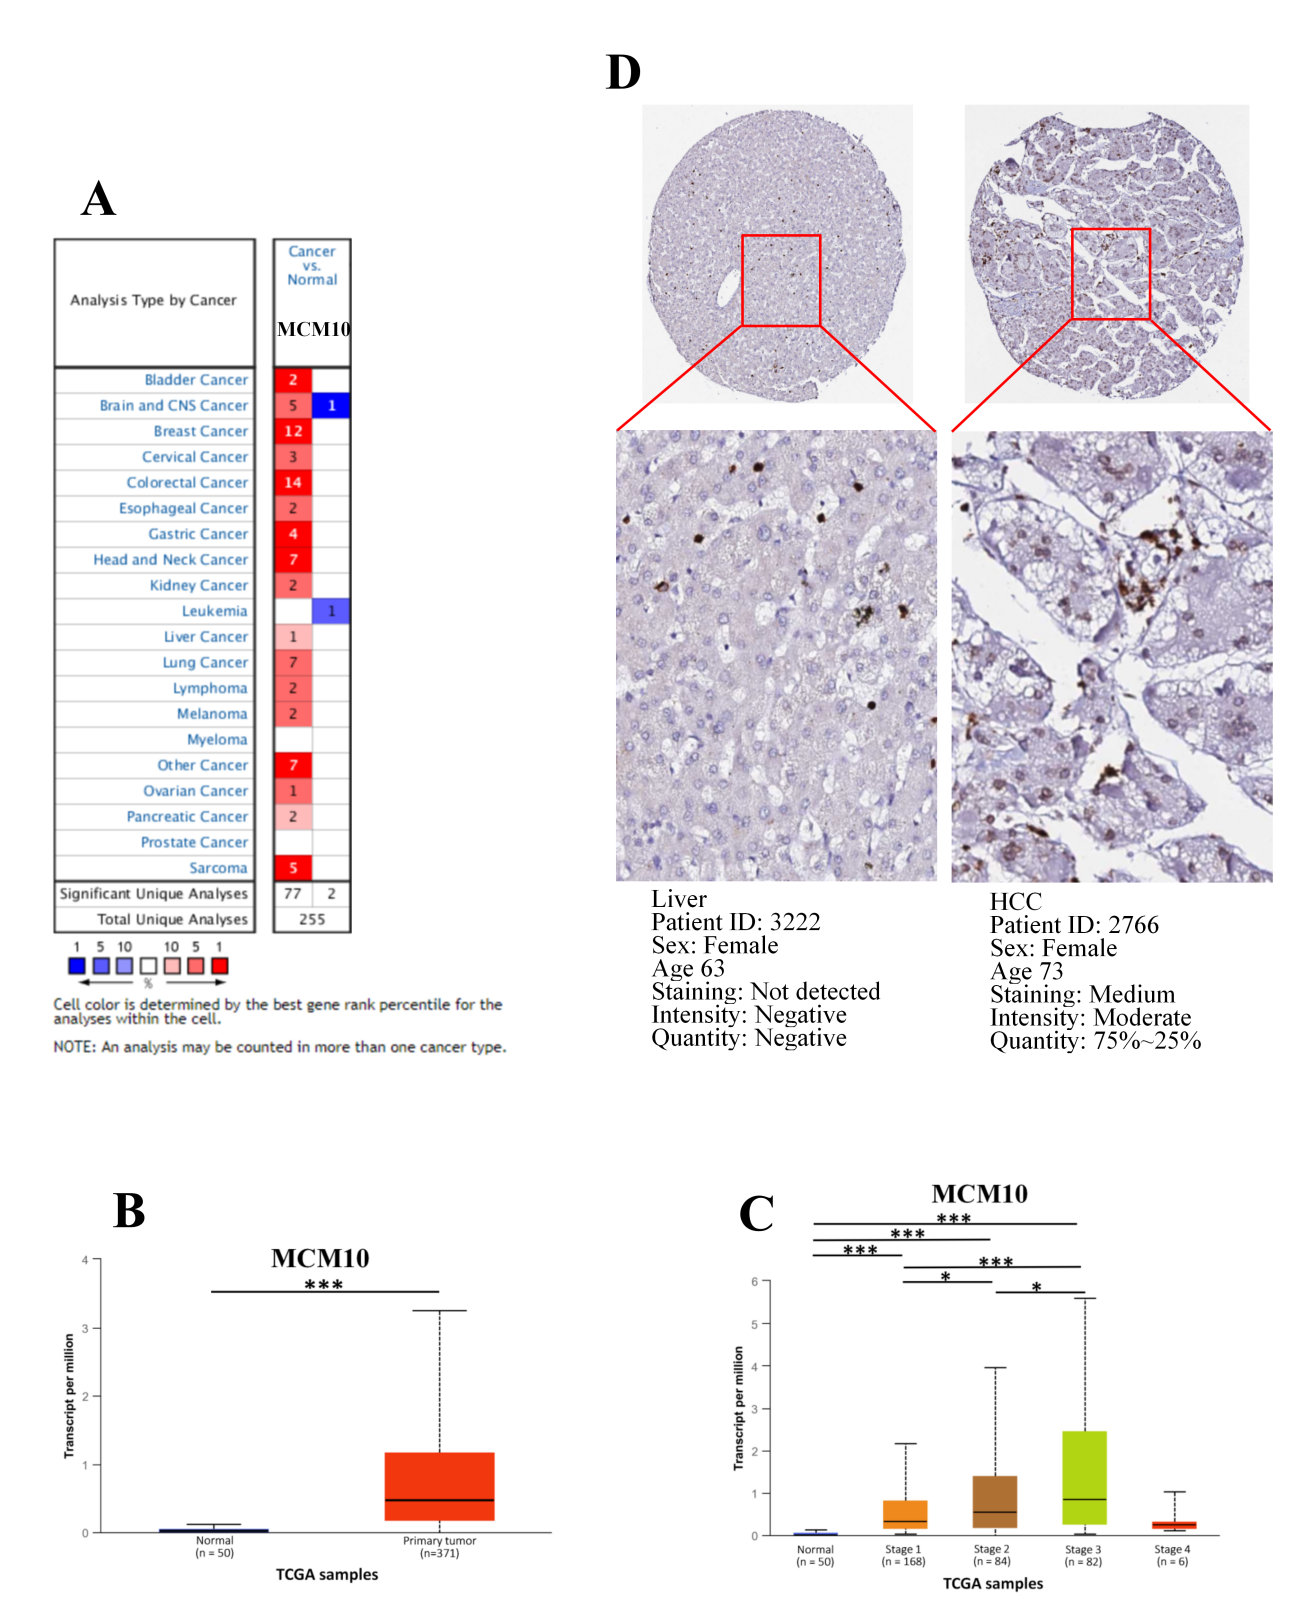


| **Supplementary Table 1. Clinicopathological characteristics of 364 HCC patients.** | |
| --- | --- |
| **Variables** | **HCC patients (N = 364)** |
| Age (years), median (IQR) | 61 (52-69) |
| Gender (male/female) | 247/117 |
| Weight (kg), median (IQR) | 69 (59-82) |
| PLT (10^9/L), median (IQR) | 211 (160.75-299) |
| Creatinine (mg/dl), median (IQR) | 0.9 (0.7-1.1) |
| Albumin (g/L), median (IQR) | 4 (3.5-4.3) |
| TB (μmol/L), median (IQR) | 0.7 (0.5-1.0) |
| PT (s), median (IQR) | 1.1 (1.0-9.25) |
| AFP (ng/ml), median (IQR) | 15 (4-266.25) |
| Child-Pugh stage |  |
| A | N = 217 |
| B | N = 21 |
| C | N = 1 |
| Adjacent hepatic tissue inflammation |  |
| None | N = 117 |
| Mild | N = 98 |
| Severe | N = 17 |
| Liver fibrosis ishak score category |  |
| No fibrosis | N = 74 |
| Portal fibrosis | N = 31 |
| Fibrous speta | N = 27 |
| Nodular formation and incomplete cirrhosis | N = 9 |
| Established cirrhosis | N = 69 |
| Vascular invasion |  |
| None | N = 204 |
| Micro | N = 90 |
| Macro | N = 16 |
| Histologic grade |  |
| 1 | N = 54 |
| 2 | N = 174 |
| 3 | N = 119 |
| 4 | N = 12 |
| Pathologic stage |  |
| 1 | N = 170 |
| 2 | N = 84 |
| 3 | N = 83 |
| 4 | N = 4 |
| IQR: interquartile range; PT: prothrombin time; TB: total bilirubin | |

| **Supplementary Table 2. Estimated AUC value of TNM and MCM10 in 364 HCC patients after follow-up*.** | | |
| --- | --- | --- |
|  | AUC of TNM stage | AUC of MCM10 |
| 1-year OS | 0.656 (0.579-0.733) | 0.700 (0.639-0.761) |
| 2-year OS | 0.621 (0.548-0.695) | 0.635 (0.568-0.702) |
| 3-year OS | 0.672 (0.598-0.745) | 0.627 (0.554-0.699) |
| 4-year OS | 0.648 (0.566-0.729) | 0.619 (0.539-0.698) |
| 5-year OS | 0.636 (0.542-0.729) | 0.600 (0.509-0.690) |
| 1-year DFS | 0.687 (0.624-0.751) | 0.688 (0.630-0.746) |
| 2-year DFS | 0.684 (0.615-0.752) | 0.627 (0.558-0.696) |
| 3-year DFS | 0.671 (0.594-0.748) | 0.574 (0.492-0.656) |
| 4-year DFS | 0.672 (0.582-0.762) | 0.567 (0.471-0.662) |
| 5-year DFS | 0.647 (0.522-0.771) | 0.632 (0.524-0.740) |
| * There were no significant differences between the two groups (all *P* ≥ 0.05). | | |

| **Supplementary Table 3. Summary of significantly enriched GO annotations of MCM10 related network.** | | | | | | |
| --- | --- | --- | --- | --- | --- | --- |
| **Description** | **Gene count** | **%** | **P-value** | **Enriched genes** | **Fold enrichment** | **FDR** |
| ***Biological Process*** |  |  |  |  |  |  |
| GO:0006260~DNA replication | 39 | 76.47 | 9.48E-70 | PCNA, MCM7, MCM8, MCM10, ORC5, ORC4, ORC6, CDC45, ORC1, ORC3, POLD1, ORC2, CHEK1, TOPBP1, POLE, RFC5, GINS2, CDT1, RFC3, TIPIN, RFC4, GINS3, GINS4, RPA1, RPA2, CDC7, CDC6, POLA1, POLA2, DBF4, RPA3, POLE2, CDK2, MCM3, CDK1, MCM4, MCM5, MCM6, MCM2 | 84.50 | 1.57E-67 |
| GO:0000082~G1/S transition of mitotic cell cycle | 33 | 64.71 | 3.13E-61 | PRIM2, PCNA, MCM7, MCM8, PRIM1, MCM10, ORC5, ORC4, ORC6, CDC45, ORC1, ORC3, ORC2, POLE, CDT1, RPA1, RPA2, CDC7, CDC6, CCNA1, POLA1, POLA2, DBF4, CCNE1, RPA3, POLE2, CDK2, MCM3, CDK1, MCM4, MCM5, MCM6, MCM2 | 108.65 | 2.60E-59 |
| GO:0006270~DNA replication initiation | 26 | 50.98 | 7.48E-61 | PRIM2, MCM7, PRIM1, MCM10, ORC5, ORC4, ORC6, CDC45, ORC1, ORC3, ORC2, TOPBP1, POLE, GINS4, CDC7, LRWD1, CDC6, POLA1, POLA2, CCNE1, POLE2, MCM3, MCM4, MCM5, MCM6, MCM2 | 272.87 | 4.34E-59 |
| GO:0006271~DNA strand elongation involved in DNA replication | 12 | 23.53 | 5.27E-26 | GINS1, PRIM2, GINS2, POLA1, POLA2, RFC3, RFC4, PCNA, POLD1, GINS3, PRIM1, GINS4 | 268.67 | 2.16E-24 |
| GO:0000722~telomere maintenance via recombination | 14 | 27.45 | 6.49E-26 | RFC5, PRIM2, RFC3, RFC4, PCNA, PRIM1, RPA1, RPA2, POLA1, POLA2, RPA3, POLD1, POLE2, POLE | 146.93 | 2.16E-24 |
| GO:0000083~regulation of transcription involved in G1/S transition of mitotic cell cycle | 9 | 17.65 | 1.36E-15 | CCNA1, CDT1, POLA1, PCNA, CDC45, ORC1, CCNE1, CDK1, CDC6 | 131.42 | 3.77E-14 |
| GO:0006297~nucleotide-excision repair, DNA gap filling | 9 | 17.65 | 2.04E-15 | RFC5, RFC3, RFC4, PCNA, POLD1, RPA3, RPA1, RPA2, POLE | 125.94 | 4.83E-14 |
| GO:0006281~DNA repair | 11 | 21.57 | 1.21E-09 | RFC5, POLA1, POLD1, POLE2, RPA3, CHEK1, CDK2, RPA1, CDK1, TOPBP1, POLE | 15.72 | 1.44E-08 |
| GO:1901796~regulation of signal transduction by p53 class mediator | 9 | 17.65 | 2.46E-09 | RFC5, RFC3, RFC4, RPA3, CHEK1, CDK2, RPA1, RPA2, TOPBP1 | 24.38 | 2.56E-08 |
| GO:0051301~cell division | 10 | 19.61 | 6.60E-07 | CCNA2, CCNA1, TIPIN, CCNE1, CDK2, CDK1, MCMBP, CDC7, MCM5, CDC6 | 9.60 | 5.77E-06 |
| ***Cellular Component*** |  |  |  |  |  |  |
| GO:0005654~nucleoplasm | 49 | 96.08 | 4.26E-37 | MCM7, MCM8, GMNN, MCM10, CHEK1, TOPBP1, POLE, RFC5, WDHD1, TIPIN, RFC3, RFC4, CCNA2, CCNA1, DBF4, CCNE1, MCM3, MCM4, MCM5, MCM6, MCM2, PRIM2, PCNA, PRIM1, DBF4B, ORC5, ORC4, ORC6, CDC45, ORC1, ORC3, POLD1, ORC2, MCMBP, GINS1, GINS2, CDT1, GINS3, GINS4, RPA1, RPA2, CDC7, CDC6, POLA1, POLA2, POLE2, RPA3, CDK2, CDK1 | 6.29 | 2.22E-35 |
| GO:0000784~nuclear chromosome, telomeric region | 16 | 31.37 | 4.94E-21 | PCNA, MCM7, RPA1, RPA2, ORC5, ORC4, ORC1, ORC3, POLD1, ORC2, MCM3, CDK1, MCM4, MCM5, MCM6, MCM2 | 43.98 | 1.28E-19 |
| GO:0005664~nuclear origin of replication recognition complex | 8 | 15.69 | 2.71E-17 | ORC5, ORC4, ORC6, ORC1, ORC3, ORC2, LRWD1, MCM2 | 317.63 | 4.69E-16 |
| GO:0042555~MCM complex | 7 | 13.73 | 2.61E-14 | MCM7, MCM3, MCMBP, MCM4, MCM5, MCM6, MCM2 | 277.93 | 3.39E-13 |
| GO:0005634~nucleus | 41 | 80.39 | 2.57E-13 | PCNA, MCM7, MCM8, GMNN, MCM10, DBF4B, ORC5, ORC4, ORC6, CDC45, ORC1, POLD1, ORC2, CHEK1, MCMBP, TOPBP1, CCNL1, POLE, GINS1, GINS2, CDT1, TIPIN, GINS3, GINS4, RPA1, RPA2, CDC7, LRWD1, CDC6, CCNA2, CCNA1, POLA1, CCNE1, RPA3, CDK2, MCM3, CDK1, MCM4, MCM5, MCM6, MCM2 | 2.71 | 2.67E-12 |
| GO:0000808~origin recognition complex | 6 | 11.76 | 7.58E-13 | ORC5, ORC4, ORC6, ORC1, ORC3, ORC2 | 357.33 | 6.57E-12 |
| GO:0005658~alpha DNA polymerase: primase complex | 5 | 9.80 | 7.49E-10 | PRIM2, POLA1, POLA2, PRIM1, MCM3 | 297.78 | 5.56E-09 |
| GO:0031298~replication fork protection complex | 5 | 9.80 | 1.74E-09 | GINS2, TIPIN, CDC45, GINS4, MCM10 | 255.24 | 1.13E-08 |
| GO:0005813~centrosome | 8 | 15.69 | 1.52E-04 | PCNA, CDC45, ORC2, CHEK1, CDK2, CDK1, MCM3, TOPBP1 | 6.71 | 6.60E-04 |
| GO:0005737~cytoplasm | 25 | 49.02 | 2.89E-03 | PCNA, MCM7, GMNN, MCM10, DBF4B, ORC5, ORC4, CDC45, ORC1, POLD1, MCMBP, TOPBP1, GINS1, WDHD1, TIPIN, GINS4, CDC7, LRWD1, CDC6, CCNA2, POLA1, POLA2, CDK2, CDK1, MCM2 | 1.71 | 9.39E-03 |
| ***Molecular Function*** |  |  |  |  |  |  |
| GO:0003688~DNA replication origin binding | 9 | 17.65 | 4.52E-19 | ORC5, ORC4, ORC6, CDC45, ORC3, ORC2, MCM10, MCM5, MCM2 | 276.23 | 2.04E-17 |
| GO:0003677~DNA binding | 25 | 49.02 | 3.79E-12 | PRIM2, PCNA, MCM7, MCM8, ORC4, ORC6, ORC1, POLD1, TOPBP1, POLE, RFC5, CDT1, WDHD1, RFC3, TIPIN, RFC4, RPA1, POLA1, POLA2, RPA3, POLE2, MCM3, MCM4, MCM6, MCM2 | 5.04 | 8.09E-11 |
| GO:0003697~single-stranded DNA binding | 10 | 19.61 | 5.39E-12 | PRIM2, CDC45, MCM7, PRIM1, RPA3, RPA1, RPA2, MCM4, MCM10, MCM6 | 36.30 | 8.09E-11 |
| GO:0003678~DNA helicase activity | 6 | 11.76 | 6.81E-09 | MCM7, MCM3, MCM4, MCM5, MCM6, MCM2 | 84.41 | 7.66E-08 |
| GO:0003887~DNA-directed DNA polymerase activity | 6 | 11.76 | 1.88E-08 | PRIM2, POLA1, POLA2, POLD1, POLE2, POLE | 69.85 | 1.69E-07 |
| GO:0005515~protein binding | 44 | 86.27 | 1.22E-07 | PCNA, MCM7, MCM8, GMNN, MCM10, DBF4B, ORC5, ORC4, ORC6, CDC45, ORC1, ORC3, POLD1, ORC2, CHEK1, MCMBP, TOPBP1, CCNL1, RFC5, GINS2, CDT1, WDHD1, RFC3, TIPIN, RFC4, GINS4, RPA1, RPA2, CDC7, LRWD1, CDC6, CCNA2, CCNA1, POLA1, CCNE1, RPA3, POLE2, CDK2, MCM3, CDK1, MCM4, MCM5, MCM6, MCM2 | 1.69 | 9.13E-07 |
| GO:0003682~chromatin binding | 10 | 19.61 | 1.58E-06 | POLA1, PCNA, CDC45, ORC1, POLD1, CDK1, MCMBP, MCM5, LRWD1, POLE | 8.63 | 8.91E-06 |
| GO:0005524~ATP binding | 17 | 33.33 | 2.63E-06 | RFC5, RFC4, MCM7, MCM8, CDC7, CDC6, ORC5, ORC4, ORC1, CHEK1, CDK2, MCM3, CDK1, MCM4, MCM5, MCM6, MCM2 | 3.84 | 1.32E-05 |
| GO:0019899~enzyme binding | 7 | 13.73 | 3.85E-04 | RFC5, RFC4, PCNA, POLD1, RPA2, MCM10, MCM2 | 7.10 | 1.16E-03 |
| GO:0000166~nucleotide binding | 6 | 11.76 | 3.28E-03 | ORC5, ORC4, POLA1, POLD1, CDC6, POLE | 5.82 | 8.68E-03 |
| ***KEGG Pathway*** |  |  |  |  |  |  |
| hsa03030:DNA replication | 20 | 39.22 | 5.11E-37 | RFC5, PRIM2, RFC3, RFC4, PCNA, MCM7, PRIM1, RPA1, RPA2, POLA1, POLA2, RPA3, POLD1, POLE2, MCM3, MCM4, MCM5, MCM6, POLE, MCM2 | 106.16 | 7.67E-36 |
| hsa04110:Cell cycle | 23 | 45.10 | 7.39E-31 | PCNA, MCM7, CDC7, CDC6, ORC5, CCNA2, CCNA1, ORC4, ORC6, DBF4, CDC45, ORC1, CCNE1, ORC3, ORC2, CHEK1, CDK2, MCM3, CDK1, MCM4, MCM5, MCM6, MCM2 | 35.44 | 5.54E-30 |
| hsa03420:Nucleotide excision repair | 10 | 19.61 | 8.94E-13 | RFC5, RFC3, RFC4, PCNA, POLD1, POLE2, RPA3, RPA1, RPA2, POLE | 40.66 | 4.47E-12 |
| hsa03430:Mismatch repair | 8 | 15.69 | 1.08E-11 | RFC5, RFC3, RFC4, PCNA, POLD1, RPA3, RPA1, RPA2 | 66.46 | 4.05E-11 |
| hsa00240:Pyrimidine metabolism | 7 | 13.73 | 9.92E-06 | PRIM2, POLA1, POLA2, POLD1, POLE2, PRIM1, POLE | 13.24 | 2.98E-05 |
| hsa00230:Purine metabolism | 7 | 13.73 | 2.26E-04 | PRIM2, POLA1, POLA2, POLD1, POLE2, PRIM1, POLE | 7.60 | 5.64E-04 |
| hsa03440:Homologous recombination | 4 | 7.84 | 4.03E-04 | POLD1, RPA3, RPA1, RPA2 | 26.36 | 8.63E-04 |
| hsa03410:Base excision repair | 4 | 7.84 | 5.93E-04 | PCNA, POLD1, POLE2, POLE | 23.16 | 1.11E-03 |
| hsa05203:Viral carcinogenesis | 6 | 11.76 | 3.51E-03 | CCNA2, CCNA1, CCNE1, CHEK1, CDK2, CDK1 | 5.59 | 5.85E-03 |
| hsa04115:p53 signaling pathway | 4 | 7.84 | 4.63E-03 | CCNE1, CHEK1, CDK2, CDK1 | 11.41 | 6.94E-03 |
| hsa05161:Hepatitis B | 5 | 9.80 | 5.97E-03 | CCNA2, CCNA1, PCNA, CCNE1, CDK2 | 6.59 | 8.14E-03 |
| hsa04914:Progesterone-mediated oocyte maturation | 4 | 7.84 | 9.55E-03 | CCNA2, CCNA1, CDK2, CDK1 | 8.79 | 1.19E-02 |
| hsa03460:Fanconi anemia pathway | 3 | 5.88 | 2.95E-02 | RPA3, RPA1, RPA2 | 10.82 | 3.40E-02 |
| hsa05166:HTLV-I infection | 5 | 9.80 | 3.87E-02 | PCNA, POLD1, POLE2, CHEK1, POLE | 3.76 | 4.15E-02 |
